# Supplementary material for: One Single Amino Acid for Estimation the Content of Total Free Amino Acids in Qingkailing Injection Using High-Performance Liquid Chromatography-Diode Array Detection
Source: PubMed Central journal article supplement (PMC3976834; doi:10.1155/2014/951075), 2014-03-13
Supplement: 951075.f1.pdf [file 951075.f1.pdf]

## ***Supplementary materials***

### **One single amino acid for estimation the content of total free amino acids in *Qingkailing injection* using high-performance liquid chromatography-diode array detection**

Li Zhang<sup>a</sup>, Haiyu Liu<sup>a</sup>, Long Peng<sup>a</sup>, Mingxing Guo<sup>a</sup>, Zhixin Zhang<sup>a</sup>, Lingling Qin<sup>a</sup>, Xiaoyan Gao<sup>a,\*</sup>

<sup>a</sup> Science Experiment Center for Traditional Chinese Medicine, Beijing University of Chinese Medicine, No. 11, North Third Ring Road, Chaoyang District, Beijing 100029, P. R. China

\* Corresponding author: Xiaoyan Gao, Science Experiment Center for Traditional Chinese Medicine, Beijing University of Chinese Medicine, No. 11, North Third Ring Road, Chaoyang District, Beijing 100029, P. R. China, Tel: +86 010 64286401; Fax: +86 010 64286052; E-mail: ga Xiaoyan0913@sina.com

## Supplementary materials

**Table S-1.** Comparison of AAs content determined by two methods( Method I)

**Table S-2.** Comparison of AAs content determined by two methods( Method II)

**Table S-3.** Comparison of AAs content determined by two methods( Method III)

**Table S-4.** Comparison of AAs content determined by two methods( Method IV)

**Table S-5.** RCFs in different instruments and columns

Table S1: Contents of 14 AAs in different batches of *QKLI*

| AAs | 113901A   |           |                        | 110701A   |           |                        | 111203A   |           |                        | 110505A   |           |                        | 010705A   |           |                        | 012907A   |           |                        |
|-----|-----------|-----------|------------------------|-----------|-----------|------------------------|-----------|-----------|------------------------|-----------|-----------|------------------------|-----------|-----------|------------------------|-----------|-----------|------------------------|
|     | a         | b         | RD <sup>a</sup><br>(%) | a         | b         | RD <sup>a</sup><br>(%) | a         | b         | RD <sup>a</sup><br>(%) | a         | b         | RD <sup>a</sup><br>(%) | a         | b         | RD <sup>a</sup><br>(%) | a         | b         | RD <sup>a</sup><br>(%) |
| Gly | -         | 1.10<br>0 | -                      | -         | 1.04<br>1 | -                      | -         | 1.12<br>6 | -                      | -         | 1.01<br>3 | -                      | -         | 1.27<br>4 | -                      | -         | 1.07<br>3 | -                      |
| Asp | 0.38<br>9 | 0.38<br>4 | 1.31                   | 0.32<br>5 | 0.31<br>9 | 1.74                   | 0.33<br>6 | 0.33<br>1 | 1.65                   | 0.31<br>4 | 0.30<br>8 | 1.83                   | 0.45<br>0 | 0.44<br>6 | 1.02                   | 0.32<br>9 | 0.32<br>3 | 1.71                   |
| Glu | 1.03<br>1 | 1.06<br>0 | -2.70                  | 1.00<br>8 | 1.03<br>6 | -2.69                  | 1.05<br>2 | 1.08<br>1 | -2.71                  | 0.98<br>7 | 1.01<br>4 | -2.68                  | 1.31<br>1 | 1.34<br>9 | -2.81                  | 1.06<br>6 | 1.09<br>6 | -2.72                  |
| Ser | 0.28<br>8 | 0.28<br>2 | 2.17                   | 0.28<br>2 | 0.27<br>6 | 2.17                   | 0.30<br>7 | 0.30<br>1 | 2.16                   | 0.28<br>5 | 0.27<br>9 | 2.17                   | 0.32<br>4 | 0.31<br>7 | 2.15                   | 0.24<br>8 | 0.24<br>2 | 2.18                   |
| Arg | 0.70<br>8 | 0.72<br>2 | -1.97                  | 0.51<br>1 | 0.52<br>0 | -1.90                  | 0.48<br>7 | 0.49<br>6 | -1.89                  | 0.46<br>2 | 0.47<br>1 | -1.88                  | 0.65<br>4 | 0.66<br>7 | -1.96                  | 0.59<br>5 | 0.60<br>7 | -1.94                  |
| Ala | 1.12<br>2 | 1.16<br>9 | -4.06                  | 1.12<br>7 | 1.17<br>5 | -4.06                  | 1.17<br>4 | 1.22<br>4 | -4.09                  | 1.12<br>0 | 1.16<br>7 | -4.05                  | 1.26<br>2 | 1.31<br>6 | -4.15                  | 1.11<br>1 | 1.15<br>8 | -4.05                  |
| Pro | 2.38<br>1 | 2.48<br>4 | -4.14                  | 2.08<br>8 | 2.17<br>6 | -4.03                  | 2.68<br>7 | 2.80<br>6 | -4.23                  | 2.09<br>5 | 2.18<br>3 | -4.03                  | 2.78<br>8 | 2.91<br>2 | -4.26                  | 2.39<br>8 | 2.50<br>1 | -4.15                  |
| Tyr | 0.23      | 0.23      | -2.58                  | 0.25      | 0.25      | -2.68                  | 0.24      | 0.25      | -2.67                  | 0.23      | 0.24      | -2.62                  | 0.28      | 0.29      | -2.81                  | 0.25      | 0.25      | -2.67                  |

|     |      |      |       |      |      |       |      |      |       |      |      |       |      |      |       |      |      |       |
|-----|------|------|-------|------|------|-------|------|------|-------|------|------|-------|------|------|-------|------|------|-------|
|     | 2    | 8    |       | 0    | 7    |       | 8    | 5    |       | 9    | 6    |       | 3    | 1    |       | 0    | 7    |       |
| Val | 0.51 | 0.54 | -5.19 | 0.50 | 0.53 | -5.16 | 0.53 | 0.56 | -5.24 | 0.49 | 0.51 | -5.12 | 0.52 | 0.55 | -5.23 | 0.49 | 0.52 | -5.13 |
|     | 6    | 4    |       | 3    | 0    |       | 1    | 0    |       | 2    | 9    |       | 9    | 8    |       | 3    | 0    |       |
| Ile | 0.25 | 0.26 | -3.78 | 0.24 | 0.25 | -3.69 | 0.26 | 0.27 | -3.86 | 0.24 | 0.25 | -3.64 | 0.26 | 0.27 | -3.88 | 0.25 | 0.26 | -3.74 |
|     | 4    | 4    |       | 6    | 6    |       | 2    | 2    |       | 2    | 1    |       | 4    | 5    |       | 1    | 1    |       |
| Leu | 1.12 | 1.18 | -4.99 | 1.11 | 1.17 | -4.98 | 1.20 | 1.26 | -5.06 | 1.08 | 1.13 | -4.94 | 1.24 | 1.30 | -5.10 | 1.12 | 1.17 | -4.98 |
|     | 7    | 7    |       | 9    | 7    |       | 1    | 5    |       | 1    | 7    |       | 1    | 8    |       | 0    | 9    |       |
| Phe | 0.37 | 0.38 | -5.08 | 0.37 | 0.39 | -5.09 | 0.40 | 0.42 | -5.23 | 0.35 | 0.37 | -5.01 | 0.43 | 0.45 | -5.32 | 0.37 | 0.39 | -5.11 |
|     | 0    | 9    |       | 2    | 2    |       | 6    | 8    |       | 5    | 4    |       | 1    | 5    |       | 5    | 6    |       |
| Orn | 0.32 | 0.33 | -1.32 | 0.32 | 0.33 | -1.31 | 0.32 | 0.32 | -1.32 | 0.30 | 0.30 | -1.36 | 0.52 | 0.52 | -1.10 | 0.35 | 0.36 | -1.26 |
|     | 6    | 0    |       | 8    | 2    |       | 5    | 9    |       | 3    | 7    |       | 1    | 7    |       | 9    | 3    |       |
| Lys | 0.24 | 0.25 | -5.72 | 0.23 | 0.25 | -5.71 | 0.22 | 0.24 | -5.68 | 0.21 | 0.22 | -5.63 | 0.31 | 0.33 | -5.90 | 0.24 | 0.26 | -5.74 |
|     | 0    | 4    |       | 5    | 0    |       | 8    | 2    |       | 3    | 6    |       | 9    | 9    |       | 7    | 2    |       |

<sup>a</sup> relative deviation=(a-b)/b

a: the content were calculated by One for M method ; b: the content were determined by the traditional Calibration equation method

Table S2: Contents of 14 AAs in different batches of *QKLI*

| AAs | 113901A |      | RD <sup>a</sup> | 110701A |      | RD <sup>a</sup> | 111203A |      | RD <sup>a</sup> | 110505A |      | RD <sup>a</sup> | 010705A |      | RD <sup>a</sup> | 012907A |      | RD <sup>a</sup> |
|-----|---------|------|-----------------|---------|------|-----------------|---------|------|-----------------|---------|------|-----------------|---------|------|-----------------|---------|------|-----------------|
|     | a       | b    | (%)             | a       | b    | (%)             | a       | b    | (%)             | a       | b    | (%)             | a       | b    | (%)             | a       | b    | (%)             |
| Gly | -       | 1.10 | -               | -       | 1.04 | -               | -       | 1.12 | -               | -       | 1.01 | -               | -       | 1.27 | -               | -       | 1.07 | -               |
|     |         | 0    |                 |         | 1    |                 |         | 6    |                 |         | 3    |                 |         | 4    |                 |         | 3    |                 |
| Asp | 0.38    | 0.38 | 0.40            | 0.32    | 0.31 | 0.82            | 0.33    | 0.33 | 0.74            | 0.31    | 0.30 | 0.91            | 0.44    | 0.44 | 0.11            | 0.32    | 0.32 | 0.79            |
|     | 5       | 4    |                 | 2       | 9    |                 | 3       | 1    |                 | 1       | 8    |                 | 6       | 6    |                 | 6       | 3    |                 |
| Glu | 1.04    | 1.06 | -1.74           | 1.01    | 1.03 | -1.73           | 1.06    | 1.08 | -1.75           | 0.99    | 1.01 | -1.71           | 1.32    | 1.34 | -1.84           | 1.07    | 1.09 | -1.75           |
|     | 1       | 0    |                 | 8       | 6    |                 | 2       | 1    |                 | 7       | 4    |                 | 4       | 9    |                 | 6       | 6    |                 |
| Ser | 0.28    | 0.28 | -0.04           | 0.27    | 0.27 | -0.04           | 0.30    | 0.30 | -0.05           | 0.27    | 0.27 | -0.04           | 0.31    | 0.31 | -0.05           | 0.24    | 0.24 | -0.02           |
|     | 2       | 2    |                 | 6       | 6    |                 | 1       | 1    |                 | 9       | 9    |                 | 7       | 7    |                 | 2       | 2    |                 |
| Arg | 0.71    | 0.72 | -1.31           | 0.51    | 0.52 | -1.25           | 0.49    | 0.49 | -1.23           | 0.46    | 0.47 | -1.22           | 0.65    | 0.66 | -1.30           | 0.59    | 0.60 | -1.28           |
|     | 3       | 2    |                 | 4       | 0    |                 | 0       | 6    |                 | 6       | 1    |                 | 8       | 7    |                 | 9       | 7    |                 |
| Ala | 1.15    | 1.16 | -0.83           | 1.16    | 1.17 | -0.84           | 1.21    | 1.22 | -0.87           | 1.15    | 1.16 | -0.83           | 1.30    | 1.31 | -0.93           | 1.14    | 1.15 | -0.82           |
|     | 9       | 9    |                 | 5       | 5    |                 | 3       | 4    |                 | 7       | 7    |                 | 4       | 6    |                 | 8       | 8    |                 |
| Pro | 2.51    | 2.48 | 1.25            | 2.20    | 2.17 | 1.37            | 2.83    | 2.80 | 1.15            | 2.21    | 2.18 | 1.37            | 2.94    | 2.91 | 1.13            | 2.53    | 2.50 | 1.24            |
|     | 5       | 4    |                 | 6       | 6    |                 | 8       | 6    |                 | 3       | 3    |                 | 5       | 2    |                 | 2       | 1    |                 |
| Tyr | 0.24    | 0.23 | 0.54            | 0.25    | 0.25 | 0.45            | 0.25    | 0.25 | 0.46            | 0.24    | 0.24 | 0.50            | 0.29    | 0.29 | 0.31            | 0.25    | 0.25 | 0.45            |

|     |           |           |       |           |           |       |           |           |       |           |           |       |           |           |       |           |           |       |
|-----|-----------|-----------|-------|-----------|-----------|-------|-----------|-----------|-------|-----------|-----------|-------|-----------|-----------|-------|-----------|-----------|-------|
|     | 0         | 8         |       | 9         | 7         |       | 6         | 5         |       | 7         | 6         |       | 2         | 1         |       | 8         | 7         |       |
| Val | 0.53<br>9 | 0.54<br>4 | -0.91 | 0.52<br>5 | 0.53<br>0 | -0.87 | 0.55<br>5 | 0.56<br>0 | -0.95 | 0.51<br>4 | 0.51<br>9 | -0.84 | 0.55<br>3 | 0.55<br>8 | -0.95 | 0.51<br>5 | 0.52<br>0 | -0.84 |
| Ile | 0.26<br>5 | 0.26<br>4 | 0.31  | 0.25<br>7 | 0.25<br>6 | 0.40  | 0.27<br>3 | 0.27<br>2 | 0.22  | 0.25<br>3 | 0.25<br>1 | 0.45  | 0.27<br>6 | 0.27<br>5 | 0.20  | 0.26<br>1 | 0.26<br>1 | 0.35  |
| Leu | 1.18<br>4 | 1.18<br>7 | -0.21 | 1.17<br>5 | 1.17<br>7 | -0.20 | 1.26<br>1 | 1.26<br>5 | -0.29 | 1.13<br>5 | 1.13<br>7 | -0.16 | 1.30<br>3 | 1.30<br>8 | -0.33 | 1.17<br>6 | 1.17<br>9 | -0.21 |
| Phe | 0.39<br>4 | 0.38<br>9 | 1.26  | 0.39<br>7 | 0.39<br>2 | 1.25  | 0.43<br>3 | 0.42<br>8 | 1.10  | 0.37<br>9 | 0.37<br>4 | 1.34  | 0.46<br>0 | 0.45<br>5 | 1.01  | 0.40<br>0 | 0.39<br>6 | 1.24  |
| Orn | 0.32<br>8 | 0.33<br>0 | -0.62 | 0.33<br>0 | 0.33<br>2 | -0.61 | 0.32<br>7 | 0.32<br>9 | -0.62 | 0.30<br>5 | 0.30<br>7 | -0.66 | 0.52<br>5 | 0.52<br>7 | -0.40 | 0.36<br>1 | 0.36<br>3 | -0.56 |
| Lys | 0.24<br>5 | 0.25<br>4 | -3.50 | 0.24<br>1 | 0.25<br>0 | -3.49 | 0.23<br>3 | 0.24<br>2 | -3.46 | 0.21<br>8 | 0.22<br>6 | -3.41 | 0.32<br>6 | 0.33<br>9 | -3.69 | 0.25<br>3 | 0.26<br>2 | -3.52 |

<sup>a</sup> relative deviation=(a-b)/b

a: the content were calculated by One for M method ; b: the content were determined by the traditional Calibration equation method

Table S3: Contents of 14 AAs in different batches of *QKLI*

| AAs | 113901A   |           |                        | 110701A   |           |                        | 111203A   |           |                        | 110505A   |           |                        | 010705A   |           |                        | 012907A   |           |                        |
|-----|-----------|-----------|------------------------|-----------|-----------|------------------------|-----------|-----------|------------------------|-----------|-----------|------------------------|-----------|-----------|------------------------|-----------|-----------|------------------------|
|     | a         | b         | RD <sup>a</sup><br>(%) | a         | b         | RD <sup>a</sup><br>(%) | a         | b         | RD <sup>a</sup><br>(%) | a         | b         | RD <sup>a</sup><br>(%) | a         | b         | RD <sup>a</sup><br>(%) | a         | b         | RD <sup>a</sup><br>(%) |
| Gly | -         | 1.10<br>0 | -                      | -         | 1.04<br>1 | -                      | -         | 1.12<br>6 | -                      | -         | 1.01<br>3 | -                      | -         | 1.27<br>4 | -                      | -         | 1.07<br>3 | -                      |
| Asp | 0.38<br>6 | 0.38<br>4 | 0.69                   | 0.32<br>3 | 0.31<br>9 | 1.17                   | 0.33<br>4 | 0.33<br>1 | 1.07                   | 0.31<br>2 | 0.30<br>8 | 1.28                   | 0.44<br>7 | 0.44<br>6 | 0.36                   | 0.32<br>7 | 0.32<br>3 | 1.13                   |
| Glu | 1.03<br>7 | 1.06<br>0 | -2.11                  | 1.01<br>4 | 1.03<br>6 | -2.11                  | 1.05<br>8 | 1.08<br>1 | -2.11                  | 0.99<br>3 | 1.01<br>4 | -2.10                  | 1.32<br>0 | 1.34<br>9 | -2.14                  | 1.07<br>3 | 1.09<br>6 | -2.11                  |
| Ser | 0.28<br>6 | 0.28<br>2 | 1.15                   | 0.27<br>9 | 0.27<br>6 | 1.17                   | 0.30<br>4 | 0.30<br>1 | 1.07                   | 0.28<br>2 | 0.27<br>9 | 1.16                   | 0.32<br>0 | 0.31<br>7 | 1.00                   | 0.24<br>6 | 0.24<br>2 | 1.36                   |
| Arg | 0.71<br>1 | 0.72<br>2 | -1.62                  | 0.51<br>2 | 0.52<br>0 | -1.66                  | 0.48<br>8 | 0.49<br>6 | -1.67                  | 0.46<br>3 | 0.47<br>1 | -1.68                  | 0.65<br>6 | 0.66<br>7 | -1.63                  | 0.59<br>7 | 0.60<br>7 | -1.64                  |
| Ala | 1.14<br>6 | 1.16<br>9 | -1.95                  | 1.15<br>2 | 1.17<br>5 | -1.95                  | 1.20<br>0 | 1.22<br>4 | -1.94                  | 1.14<br>4 | 1.16<br>7 | -1.95                  | 1.29<br>1 | 1.31<br>6 | -1.92                  | 1.13<br>5 | 1.15<br>8 | -1.96                  |
| Pro | 2.47<br>7 | 2.48<br>4 | -0.26                  | 2.16<br>8 | 2.17<br>6 | -0.36                  | 2.80<br>1 | 2.80<br>6 | -0.19                  | 2.17<br>6 | 2.18<br>3 | -0.36                  | 2.90<br>7 | 2.91<br>2 | -0.17                  | 2.49<br>5 | 2.50<br>1 | -0.26                  |
| Tyr | 0.23      | 0.23      | -1.23                  | 0.25      | 0.25      | -1.19                  | 0.25      | 0.25      | -1.19                  | 0.24      | 0.24      | -1.21                  | 0.28      | 0.29      | -1.14                  | 0.25      | 0.25      | -1.19                  |

|     |           |           |       |           |           |       |           |           |       |           |           |       |           |           |       |           |           |       |
|-----|-----------|-----------|-------|-----------|-----------|-------|-----------|-----------|-------|-----------|-----------|-------|-----------|-----------|-------|-----------|-----------|-------|
|     | 6         | 8         |       | 4         | 7         |       | 2         | 5         |       | 3         | 6         |       | 8         | 1         |       | 4         | 7         |       |
| Val | 0.53<br>1 | 0.54<br>4 | -2.43 | 0.51<br>7 | 0.53<br>0 | -2.43 | 0.54<br>7 | 0.56<br>0 | -2.43 | 0.50<br>6 | 0.51<br>9 | -2.43 | 0.54<br>5 | 0.55<br>8 | -2.43 | 0.50<br>7 | 0.52<br>0 | -2.43 |
| Ile | 0.26<br>1 | 0.26<br>4 | -1.18 | 0.25<br>3 | 0.25<br>6 | -1.14 | 0.26<br>9 | 0.27<br>2 | -1.22 | 0.24<br>9 | 0.25<br>1 | -1.12 | 0.27<br>2 | 0.27<br>5 | -1.23 | 0.25<br>8 | 0.26<br>1 | -1.17 |
| Leu | 1.16<br>7 | 1.18<br>7 | -1.67 | 1.15<br>8 | 1.17<br>7 | -1.68 | 1.24<br>4 | 1.26<br>5 | -1.66 | 1.11<br>8 | 1.13<br>7 | -1.68 | 1.28<br>6 | 1.30<br>8 | -1.66 | 1.15<br>9 | 1.17<br>9 | -1.68 |
| Phe | 0.38<br>3 | 0.38<br>9 | -1.65 | 0.38<br>6 | 0.39<br>2 | -1.64 | 0.42<br>1 | 0.42<br>8 | -1.55 | 0.36<br>8 | 0.37<br>4 | -1.70 | 0.44<br>8 | 0.45<br>5 | -1.49 | 0.38<br>9 | 0.39<br>6 | -1.64 |
| Orn | 0.32<br>7 | 0.33<br>0 | -1.14 | 0.32<br>9 | 0.33<br>2 | -1.14 | 0.32<br>6 | 0.32<br>9 | -1.15 | 0.30<br>4 | 0.30<br>7 | -1.23 | 0.52<br>3 | 0.52<br>7 | -0.73 | 0.36<br>0 | 0.36<br>3 | -1.04 |
| Lys | 0.24<br>3 | 0.25<br>4 | -4.58 | 0.23<br>8 | 0.25<br>0 | -4.59 | 0.23<br>1 | 0.24<br>2 | -4.60 | 0.21<br>6 | 0.22<br>6 | -4.62 | 0.32<br>3 | 0.33<br>9 | -4.50 | 0.25<br>0 | 0.26<br>2 | -4.57 |

<sup>a</sup> relative deviation=(a-b)/b

a: the content were calculated by One for M method ; b: the content were determined by the traditional Calibration equation method



Table S4: Contents of 14 AAs in different batches of *QKLI*

| AAs | 113901A |      |       | RD <sup>a</sup> |      |       | 110701A |      |       | RD <sup>a</sup> |      |       | 111203A |      |       | RD <sup>a</sup> |      |       | 110505A |      |      | RD <sup>a</sup> |      |      | 010705A |      |      | RD <sup>a</sup> |      |      | 012907A |      |     | RD <sup>a</sup> |  |  |
|-----|---------|------|-------|-----------------|------|-------|---------|------|-------|-----------------|------|-------|---------|------|-------|-----------------|------|-------|---------|------|------|-----------------|------|------|---------|------|------|-----------------|------|------|---------|------|-----|-----------------|--|--|
|     | a       | b    | (%)   | a               | b    | (%)   | a       | b    | (%)   | a               | b    | (%)   | a       | b    | (%)   | a               | b    | (%)   | a       | b    | (%)  | a               | b    | (%)  | a       | b    | (%)  | a               | b    | (%)  | a       | b    | (%) |                 |  |  |
| Gly | -       | 1.10 | -     | -               | 1.04 | -     | -       | 1.12 | -     | -               | 1.01 | -     | -       | 1.27 | -     | -               | 1.07 | -     | -       | 0    | -    | -               | -    | -    | 4       | -    | -    | 3               | -    | -    | 3       | -    |     |                 |  |  |
| Asp | 0.39    | 0.38 | 2.19  | 0.32            | 0.31 | 2.98  | 0.34    | 0.33 | 2.82  | 0.31            | 0.30 | 3.15  | 0.45    | 0.44 | 1.65  | 0.33            | 0.32 | 2.92  | 2       | 4    | 9    | 9               | 0    | 1    | 8       | 8    | 3    | 6               | 3    | 3    | 3       | 3    | 3   |                 |  |  |
| Glu | 1.04    | 1.06 | -1.51 | 1.02            | 1.03 | -1.49 | 1.06    | 1.08 | -1.52 | 0.99            | 1.01 | -1.48 | 1.32    | 1.34 | -1.67 | 1.07            | 1.09 | -1.53 | 4       | 0    | 1    | 6               | 5    | 1    | 9       | 4    | 7    | 9               | 9    | 6    | 9       | 6    |     |                 |  |  |
| Ser | 0.29    | 0.28 | 2.77  | 0.28            | 0.27 | 2.83  | 0.30    | 0.30 | 2.59  | 0.28            | 0.27 | 2.80  | 0.32    | 0.31 | 2.45  | 0.25            | 0.24 | 3.25  | 0       | 2    | 4    | 6               | 8    | 1    | 7       | 9    | 5    | 7               | 0    | 2    | 0       | 2    |     |                 |  |  |
| Arg | 0.71    | 0.72 | -0.64 | 0.51            | 0.52 | -0.30 | 0.49    | 0.49 | -0.25 | 0.47            | 0.47 | -0.18 | 0.66    | 0.66 | -0.56 | 0.60            | 0.60 | -0.47 | 8       | 2    | 9    | 0               | 5    | 6    | 0       | 1    | 3    | 7               | 4    | 7    | 4       | 7    |     |                 |  |  |
| Ala | 1.15    | 1.16 | -1.65 | 1.15            | 1.17 | -1.65 | 1.20    | 1.22 | -1.65 | 1.14            | 1.16 | -1.65 | 1.29    | 1.31 | -1.65 | 1.13            | 1.15 | -1.65 | 0       | 9    | 6    | 5               | 4    | 4    | 8       | 7    | 5    | 6               | 9    | 8    | 9       | 8    |     |                 |  |  |
| Pro | 2.48    | 2.48 | -0.09 | 2.17            | 2.17 | -0.16 | 2.80    | 2.80 | -0.03 | 2.18            | 2.18 | -0.16 | 2.91    | 2.91 | -0.02 | 2.49            | 2.50 | -0.09 | 2.48    | 2.48 | 2.17 | 2.17            | 2.80 | 2.80 | 2.18    | 2.18 | 2.91 | 2.91            | 2.49 | 2.50 | 2.49    | 2.50 |     |                 |  |  |

|     |      |      |       |      |      |       |      |      |       |      |      |       |      |      |       |      |      |       |
|-----|------|------|-------|------|------|-------|------|------|-------|------|------|-------|------|------|-------|------|------|-------|
|     | 1    | 4    |       | 3    | 6    |       | 5    | 6    |       | 0    | 3    |       | 2    | 2    |       | 9    | 1    |       |
| Tyr | 0.24 | 0.23 | 1.62  | 0.26 | 0.25 | 1.45  | 0.25 | 0.25 | 1.46  | 0.24 | 0.24 | 1.55  | 0.29 | 0.29 | 1.19  | 0.26 | 0.25 | 1.45  |
|     | 2    | 8    |       | 1    | 7    |       | 9    | 5    |       | 9    | 6    |       | 5    | 1    |       | 1    | 7    |       |
| Val | 0.53 | 0.54 | -1.55 | 0.52 | 0.53 | -1.53 | 0.55 | 0.56 | -1.57 | 0.51 | 0.51 | -1.51 | 0.55 | 0.55 | -1.57 | 0.51 | 0.52 | -1.51 |
|     | 5    | 4    |       | 2    | 0    |       | 1    | 0    |       | 1    | 9    |       | 0    | 8    |       | 2    | 0    |       |
| Ile | 0.26 | 0.26 | 0.74  | 0.25 | 0.25 | 0.84  | 0.27 | 0.27 | 0.64  | 0.25 | 0.25 | 0.90  | 0.27 | 0.27 | 0.61  | 0.26 | 0.26 | 0.78  |
|     | 6    | 4    |       | 8    | 6    |       | 4    | 2    |       | 4    | 1    |       | 7    | 5    |       | 3    | 1    |       |
| Leu | 1.17 | 1.18 | -1.25 | 1.16 | 1.17 | -1.25 | 1.24 | 1.26 | -1.26 | 1.12 | 1.13 | -1.24 | 1.29 | 1.30 | -1.27 | 1.16 | 1.17 | -1.25 |
|     | 2    | 7    |       | 3    | 7    |       | 9    | 5    |       | 3    | 7    |       | 1    | 8    |       | 4    | 9    |       |
| Phe | 0.38 | 0.38 | -0.06 | 0.39 | 0.39 | -0.06 | 0.42 | 0.42 | -0.10 | 0.37 | 0.37 | -0.04 | 0.45 | 0.45 | -0.13 | 0.39 | 0.39 | -0.07 |
|     | 9    | 9    |       | 2    | 2    |       | 7    | 8    |       | 4    | 4    |       | 4    | 5    |       | 5    | 6    |       |
| Orn | 0.33 | 0.33 | -0.11 | 0.33 | 0.33 | -0.11 | 0.32 | 0.32 | -0.11 | 0.30 | 0.30 | -0.11 | 0.52 | 0.52 | -0.08 | 0.36 | 0.36 | -0.10 |
|     | 0    | 0    |       | 2    | 2    |       | 9    | 9    |       | 7    | 7    |       | 6    | 7    |       | 3    | 3    |       |
| Lys | 0.24 | 0.25 | -3.31 | 0.24 | 0.25 | -3.29 | 0.23 | 0.24 | -3.26 | 0.21 | 0.22 | -3.19 | 0.32 | 0.33 | -3.54 | 0.25 | 0.26 | -3.34 |
|     | 6    | 4    |       | 1    | 0    |       | 4    | 2    |       | 9    | 6    |       | 7    | 9    |       | 4    | 2    |       |

<sup>a</sup> relative deviation=(a-b)/b

a: the content were calculated by One for M method ; b: the content were determined by the traditional Calibration equation method

Table S5: RCFs in different instruments and columns

| AAs | Agilent        |                    |                    | RSD<br>% | Wasters        |                    |                    | RSD<br>% |
|-----|----------------|--------------------|--------------------|----------|----------------|--------------------|--------------------|----------|
|     | luna<br>column | Hypersil<br>column | Diamonsi<br>column |          | luna<br>column | Hypersil<br>column | Diamonsi<br>column |          |
| Asp | 0.564          | 0.560              | 0.542              | 2.14     | 0.548          | 0.545              | 0.572              | 2.67     |
| Glu | 0.502          | 0.497              | 0.490              | 1.23     | 0.483          | 0.488              | 0.507              | 2.53     |
| Ser | 0.691          | 0.688              | 0.695              | 0.51     | 0.693          | 0.690              | 0.693              | 0.24     |
| Arg | 0.452          | 0.441              | 0.444              | 1.23     | 0.456          | 0.451              | 0.471              | 2.27     |
| Ala | 0.890          | 0.881              | 0.876              | 0.80     | 0.885          | 0.877              | 0.885              | 0.48     |
| Pro | 0.734          | 0.724              | 0.733              | 0.74     | 0.685          | 0.673              | 0.683              | 0.91     |
| Tyr | 0.468          | 0.464              | 0.466              | 0.37     | 0.472          | 0.468              | 0.470              | 0.41     |
| Val | 0.674          | 0.663              | 0.650              | 1.80     | 0.680          | 0.673              | 0.678              | 0.52     |
| Ile | 0.631          | 0.647              | 0.613              | 2.68     | 0.655          | 0.655              | 0.611              | 3.96     |
| Leu | 0.633          | 0.637              | 0.623              | 1.11     | 0.641          | 0.639              | 0.642              | 0.23     |
| Phe | 0.512          | 0.512              | 0.511              | 0.14     | 0.520          | 0.518              | 0.517              | 0.25     |
| Orn | 0.935          | 0.929              | 0.932              | 0.33     | 0.940          | 0.931              | 0.941              | 0.57     |
| Lys | 0.972          | 0.977              | 0.945              | 1.82     | 0.975          | 0.977              | 0.988              | 0.75     |
